# Supplementary material for: Exquisite design of porous carbon microtubule-scaffolding hierarchical In2O3-ZnIn2S4 heterostructures toward efficient photocatalytic conversion of CO2 into CO
Source: Royal Society of Chemistry journal article supplement (doi:10.1039/c9nr10959e), 2020-01-01
Supplement: c9nr10959e1.pdf [file c9nr10959e1.pdf]

## Supporting Information

### **Exquisite Design of Porous Carbon Microtubule-Scaffolding Hierarchical $\text{In}_2\text{O}_3$ - $\text{ZnIn}_2\text{S}_4$ Heterostructures toward Efficiently Photocatalytic Conversion of $\text{CO}_2$ into $\text{CO}$**

Wa Gao,<sup>a</sup> Lu Wang,<sup>a</sup> Chao Gao,<sup>c</sup> Jinqiu Liu,<sup>a</sup> Yong Yang,<sup>f</sup> Liuqing Yang,<sup>\*a</sup> Qing Shen,<sup>d</sup> Congping Wu,<sup>a,c</sup> Yong Zhou,<sup>\*a,b,c</sup> and Zhigang Zou<sup>a,b,c</sup>

<sup>a</sup> *National Laboratory of Solid State Microstructures, Collaborative Innovation Center of Advanced Microstructures, School of Physics, Nanjing University, Nanjing 210093, P. R. China. E-mail: zhouyong1999@nju.edu.cn*

<sup>b</sup> *Key Laboratory for Nano Technology, Nanjing University, Nanjing 210093, P. R. China. E-mail: liuqingyang@nju.edu.cn*

<sup>c</sup> *Kunshan Sunlaite New Energy Co., Ltd, Kunshan Innovation Institute of Nanjing University, Kunshan, Jiangsu 215347, P. R. China.*

<sup>d</sup> *Faculty of Informatics and Engineering, the University of Electro-Communications, Tokyo 182-8585, Japan.*

<sup>e</sup> *Univ Sci & Technol China, Hefei Natl Lab Phys Sci Microscale, iChEM Collaborat Innovat Ctr Chem Energy Mat, Sch Chem & Mat Sci, Natl Synchrotron Radiat Lab, Hefei 230026, Anhui, Peoples R China.*

<sup>f</sup> *Key Laboratory of Soft Chemistry and Functional Materials (MOE), Nanjing University of Science and Technology, Nanjing 210094, P. R. China.*

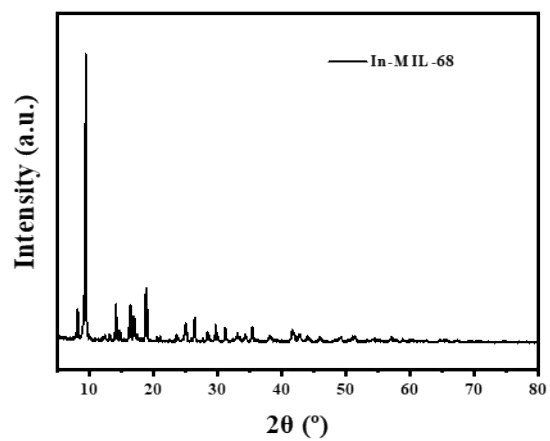

**Figure S1.** XRD pattern of In-MIL-68.

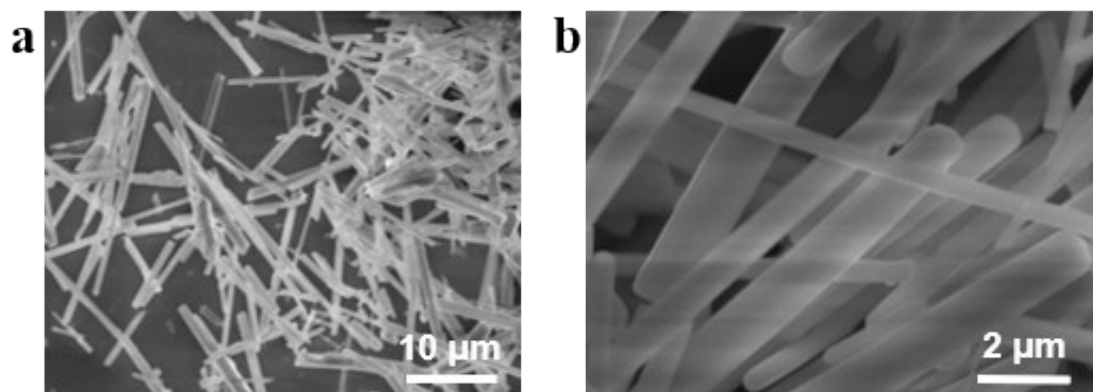

**Figure S2.** (a, b) FE-SEM images of In-MIL-68.

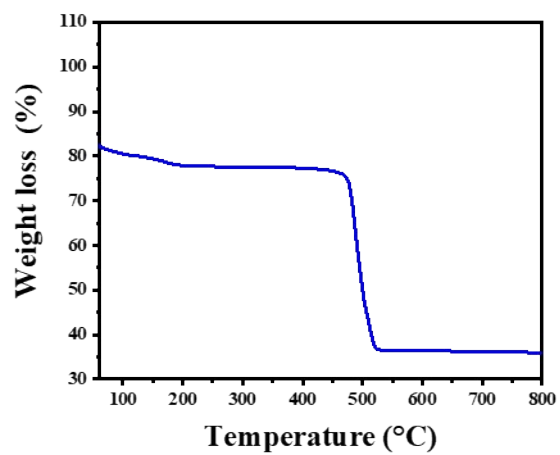

**Figure S3.** TGA curve of In-MIL-68 in air atmosphere with a heating rate of 5 °C min<sup>-1</sup>.

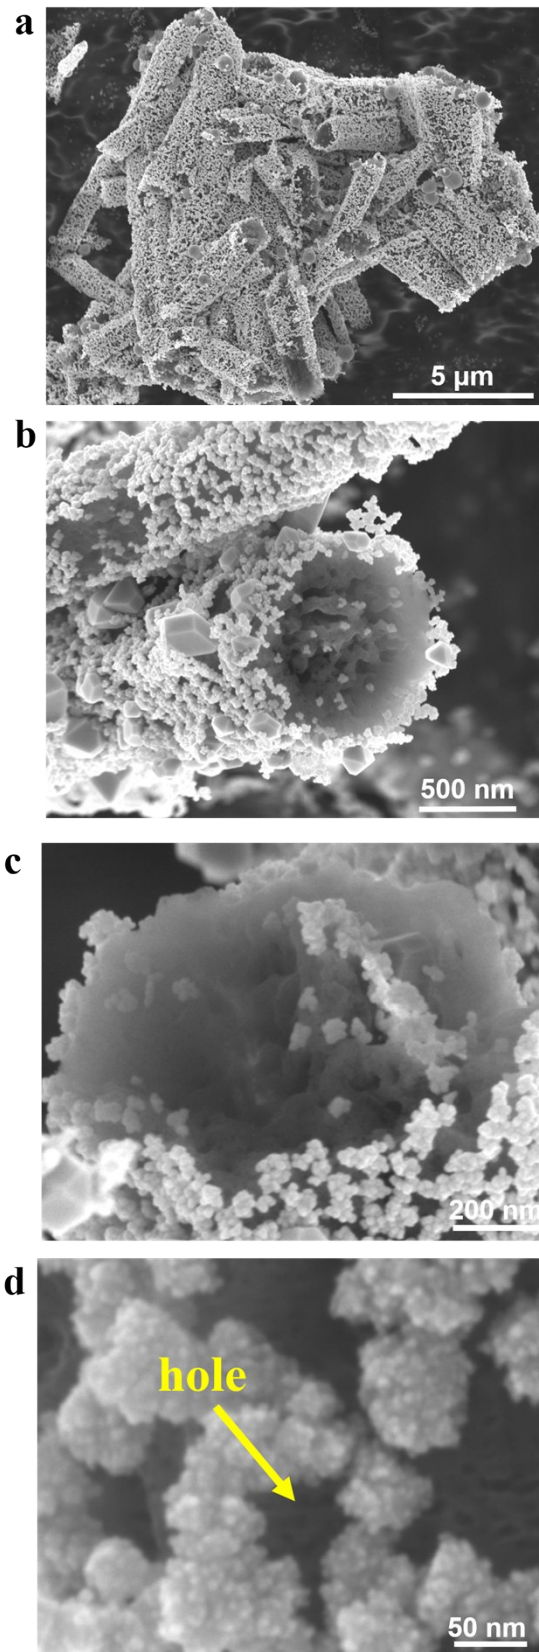

**Figure S4.** (a-d) SEM images of PCMT@In<sub>2</sub>O<sub>3</sub> with well-defined open ends after calcination.

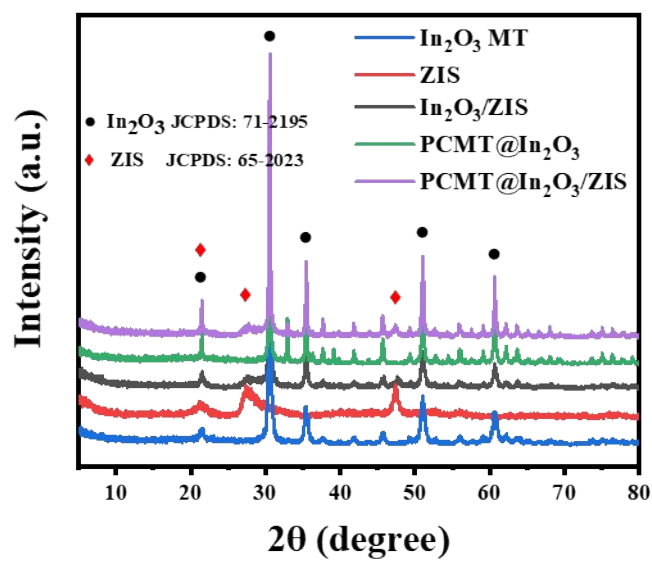

Figure S5. The corresponding XRD patterns of different samples.

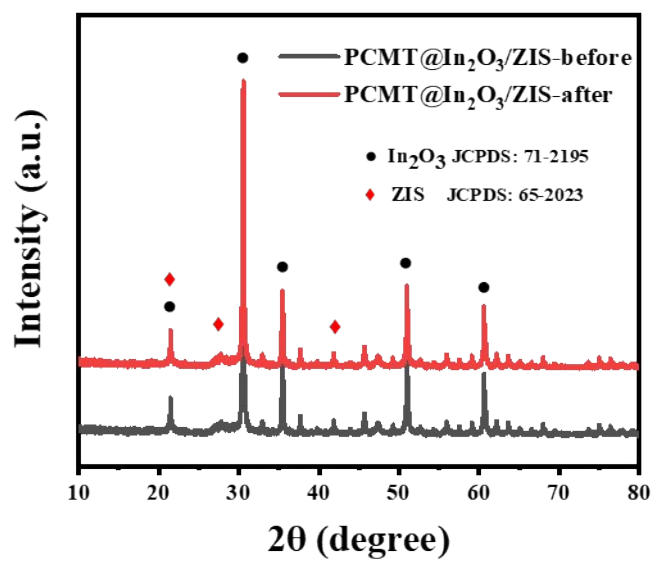

**Figure S6.** The corresponding XRD patterns of PCMT@In<sub>2</sub>O<sub>3</sub>/ZIS before and after photocatalytic CO<sub>2</sub> reduction test.

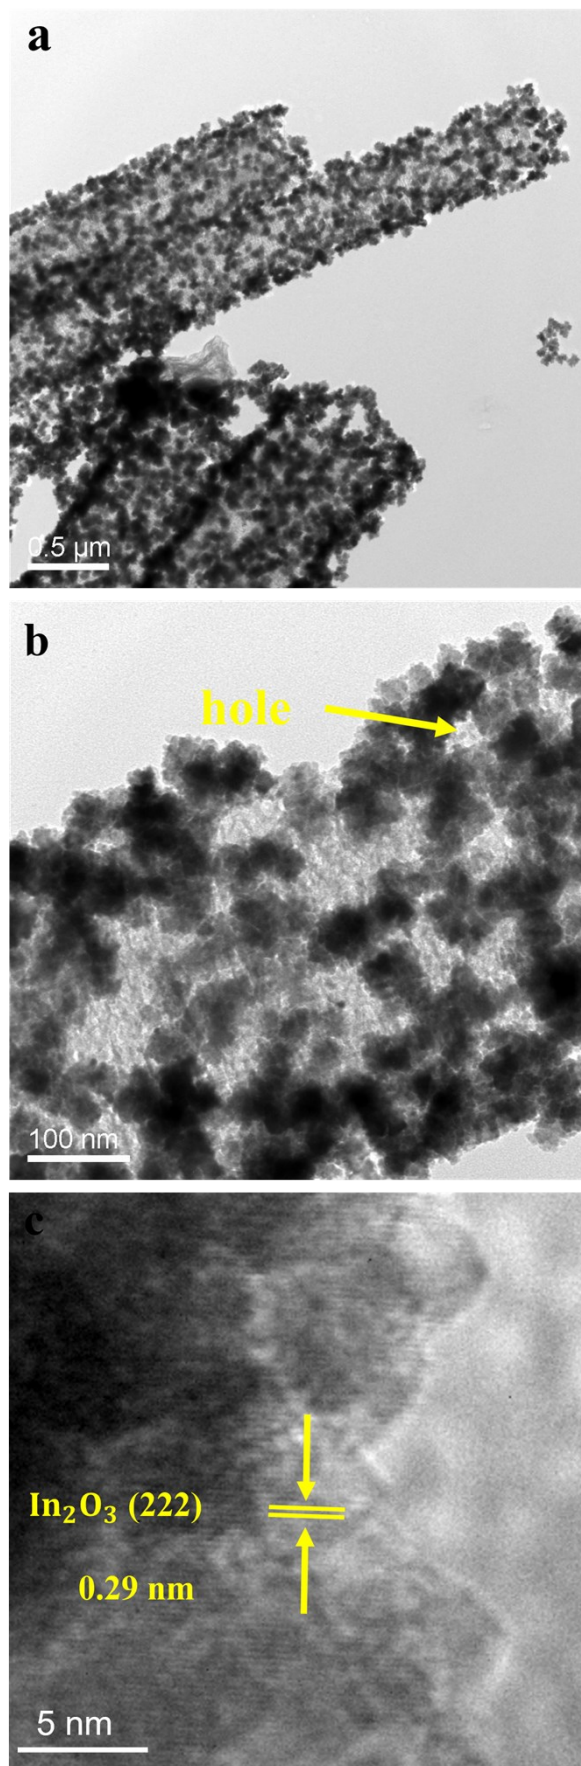

**Figure S7.** (a, b, c) TEM and (d) HRTEM image of PCMT@In<sub>2</sub>O<sub>3</sub>.



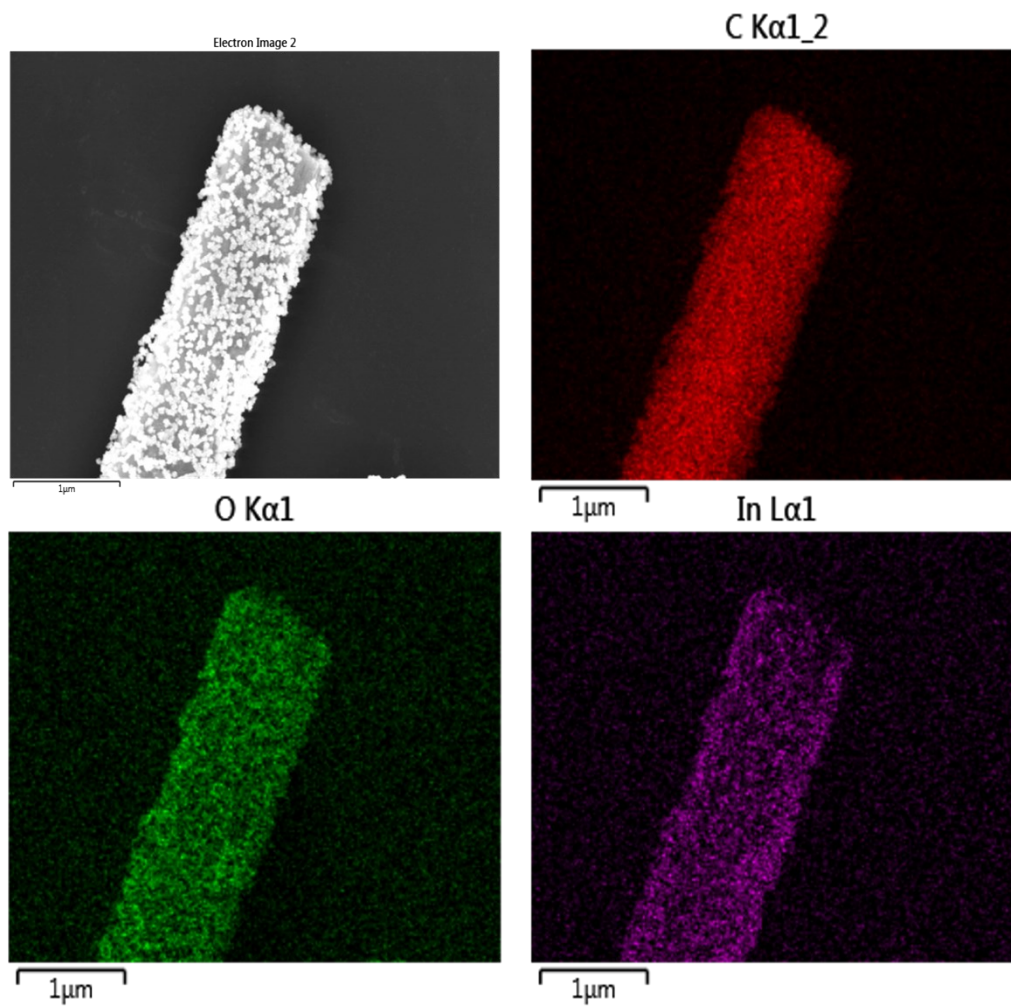

**Figure S8.** STEM-EDX elemental mapping for PCMT@In<sub>2</sub>O<sub>3</sub>

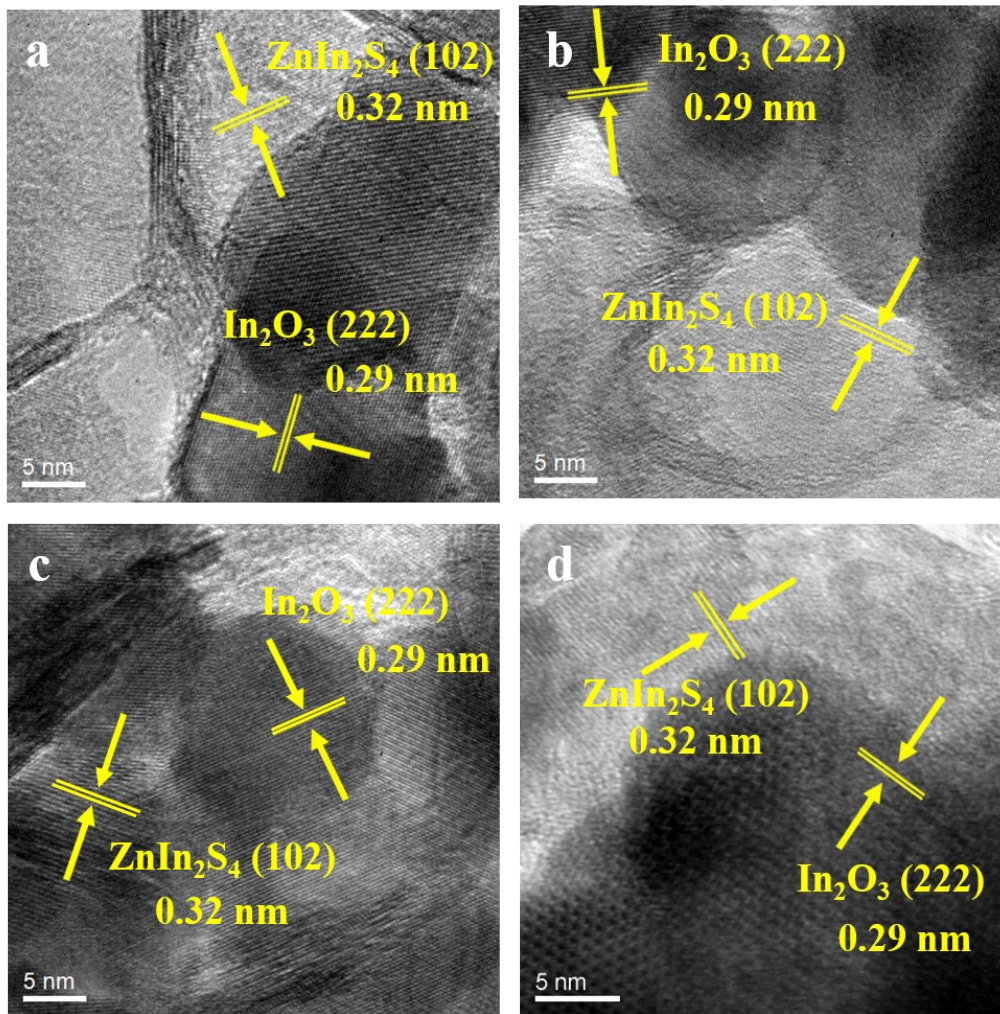

**Figure S9.** More HRTEM observation of the presence for PCMT@In<sub>2</sub>O<sub>3</sub>/ZIS.

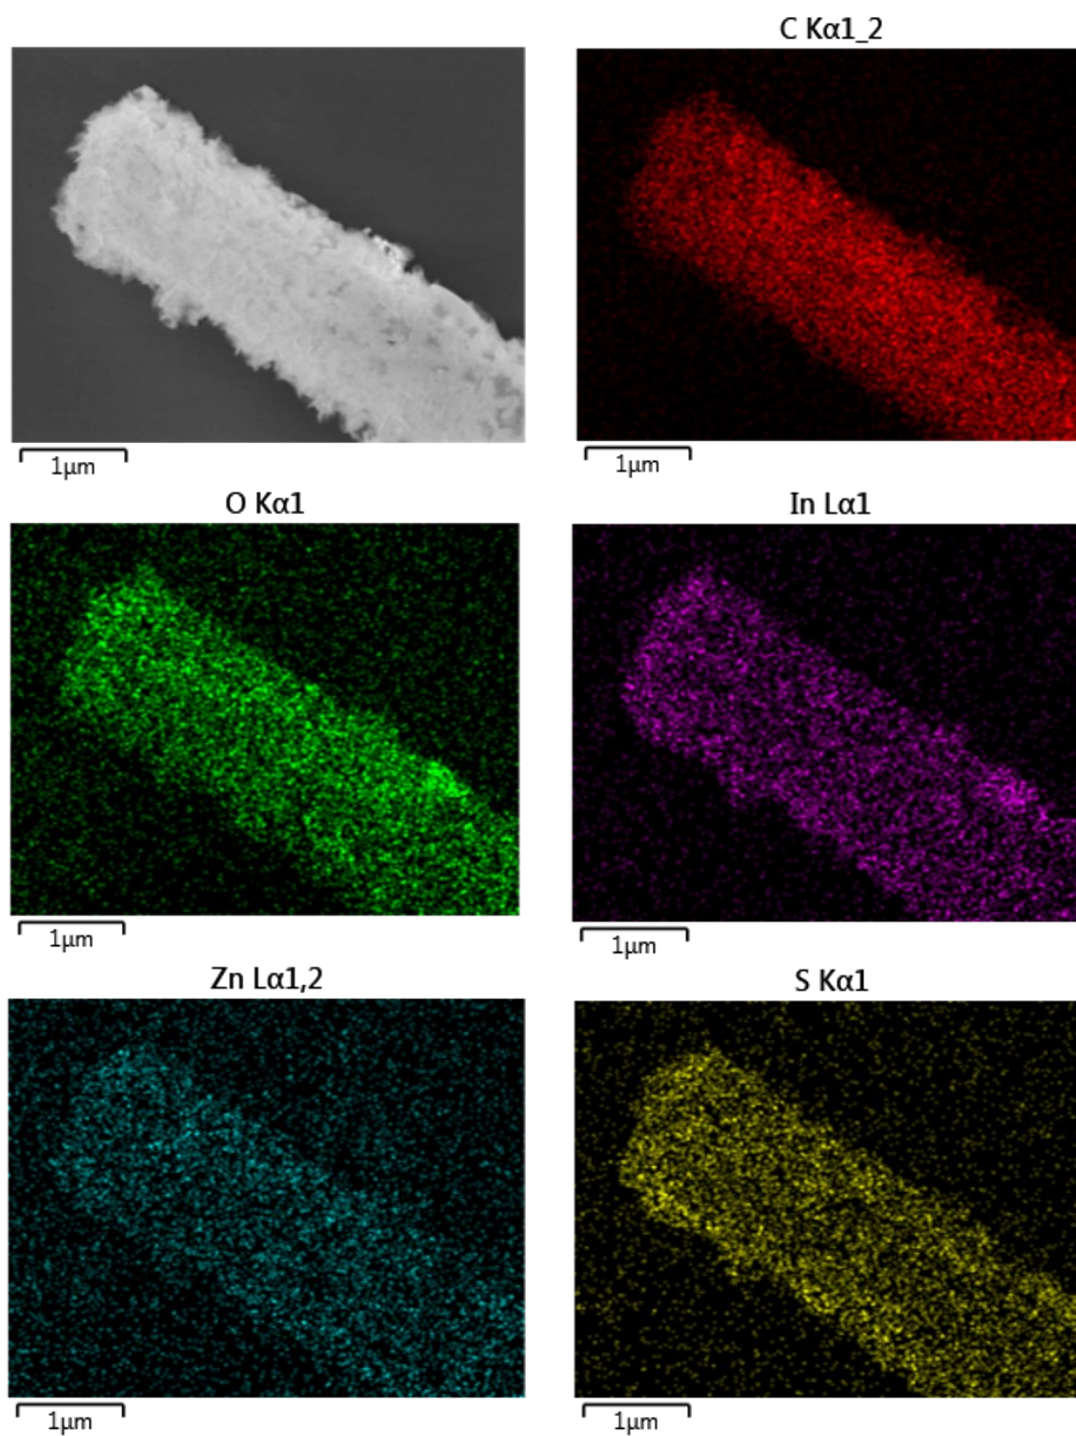

**Figure S10.** The corresponding STEM-EDX elemental mapping for

PCMT@In<sub>2</sub>O<sub>3</sub>/ZIS

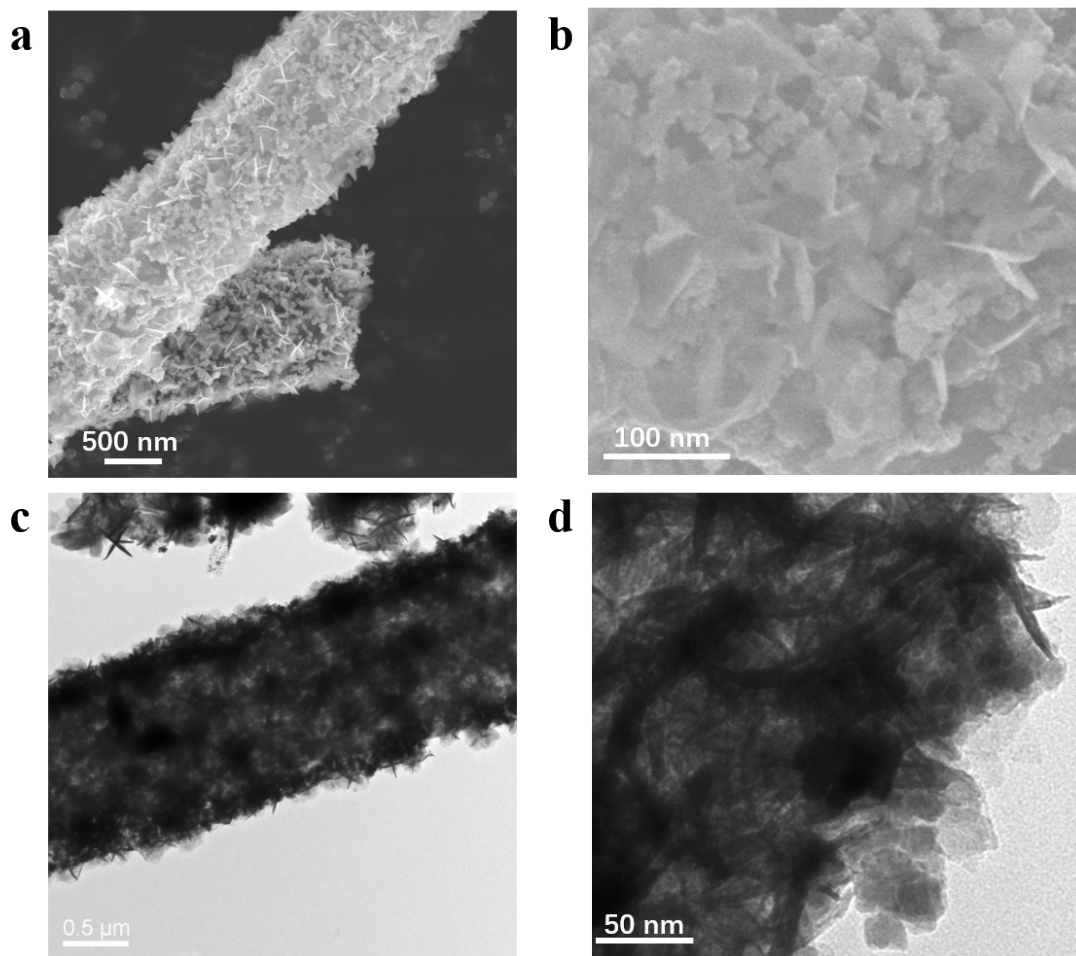

**Figure S11.** SEM and TEM images of PCMT@In<sub>2</sub>O<sub>3</sub>/ZIS after photocatalytic CO<sub>2</sub> conversion tests

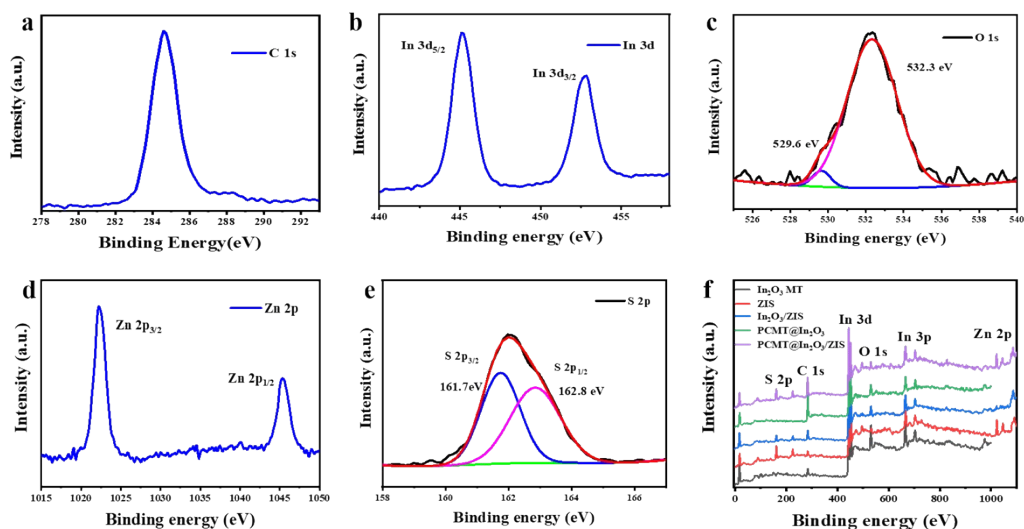

**Figure S12.** High-resolution spectra of (a) C 1s, (b) O 1s, (c) Zn 2p<sup>3</sup> (d) S 2p and (e) In 3d<sup>5</sup> of PCMT@In<sub>2</sub>O<sub>3</sub>/ZIS; (f) full XPS spectrum of different samples.

The In 3d high resolution XPS spectrum shows two peaks at 445.1 eV (In 3d<sub>5/2</sub>) and 452.8 eV (In 3d<sub>3/2</sub>), corresponding to In<sup>3+</sup>. In the high resolution XPS spectrum of O 1s (Figure S12c), the two peaks centered at 529.6 and 532.3 eV are attributed to the oxygen in In-O-In (O<sub>lattice</sub>) and the oxygen defects in metal oxide support (O<sub>defect</sub>), respectively. The Zn 2p XPS spectrum splits into 2p<sub>3/2</sub> (1022.2 eV) and 2p<sub>1/2</sub> (1045.2 eV) peaks, consistent with the values for Zn<sup>2+</sup>. The S 2p<sub>3/2</sub> peak at 161.7 eV is ascribed to S coordinated to Zn and In in ZnIn<sub>2</sub>S<sub>4</sub>. All the results indicate the chemical states of elements in PCMT@In<sub>2</sub>O<sub>3</sub>/ZIS heterostructures are In<sup>3+</sup>, O<sup>2-</sup>, Zn<sup>2+</sup>, and S<sup>2-</sup>.

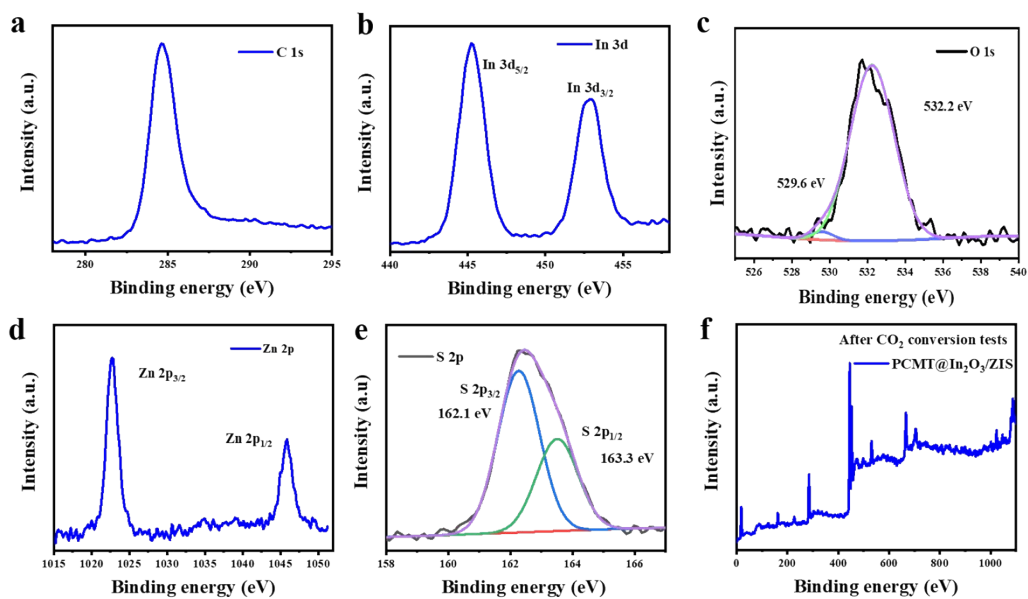

**Figure S13.** High-resolution spectra of (a) C 1s, (b) In 3d<sup>5</sup>, (c) O 1s, (d) Zn 2p<sup>3</sup>, (e) S 2p, and (f) full XPS spectrum of PCMT@In<sub>2</sub>O<sub>3</sub>/ZIS samples after photocatalytic CO<sub>2</sub> conversion tests.

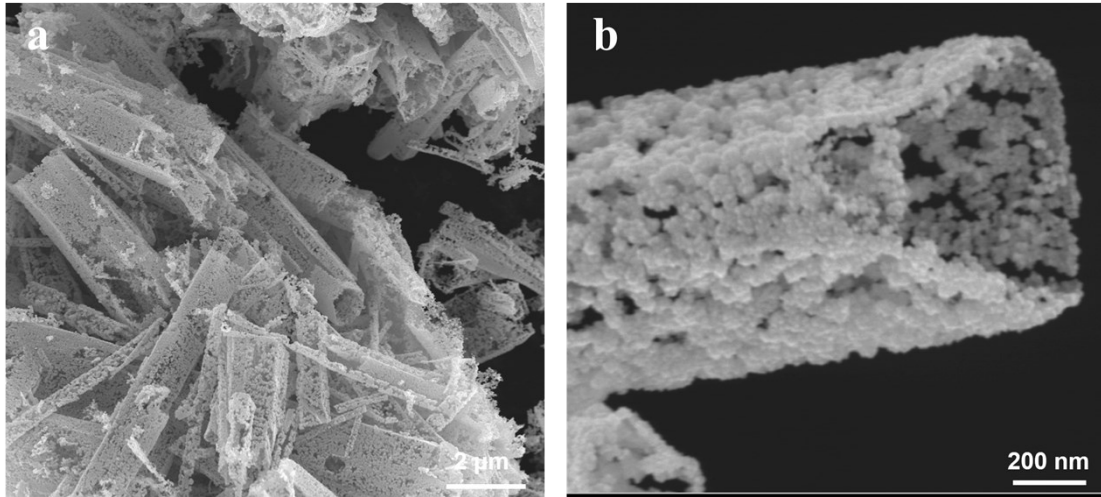

**Figure S14.** (a, b) SEM images of  $\text{In}_2\text{O}_3$  MT with well-defined open ends after calcination.

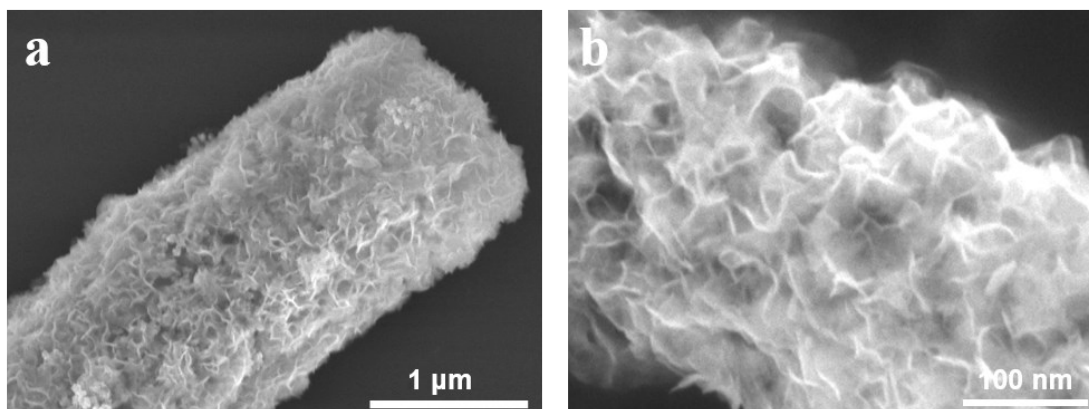

**Figure S15.** (a, b) SEM images of In<sub>2</sub>O<sub>3</sub>/ZIS.



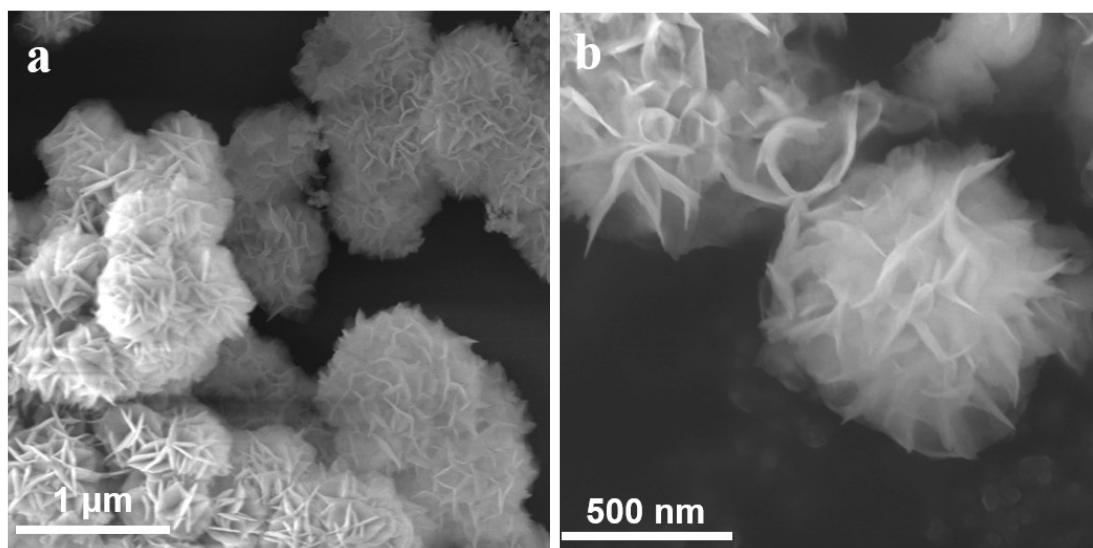

**Figure S16.** (a, b) FE-SEM images of ZIS nanosheets.

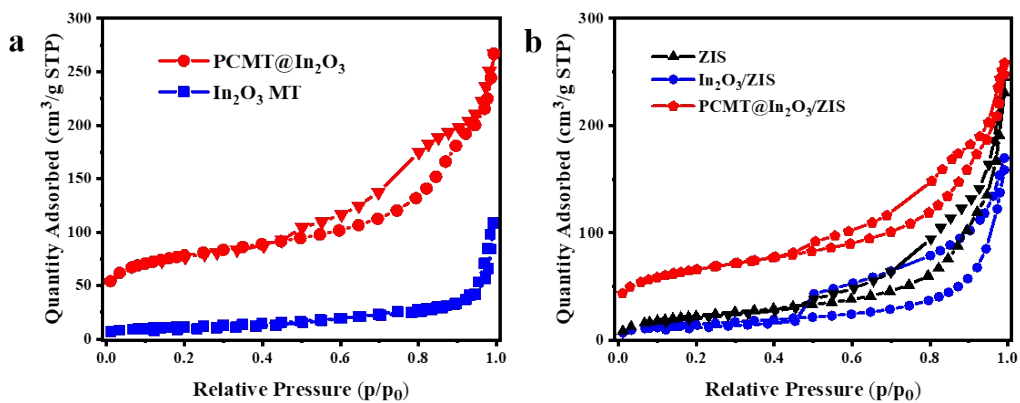

**Figure S17.** (a) Typical  $N_2$  gas adsorption-desorption isotherm of  $In_2O_3$  MT and  $PCMT@In_2O_3$ . (b) Typical  $N_2$  gas adsorption-desorption isotherm of ZIS,  $In_2O_3/ZIS$ , and  $PCMT@In_2O_3/ZIS$ .

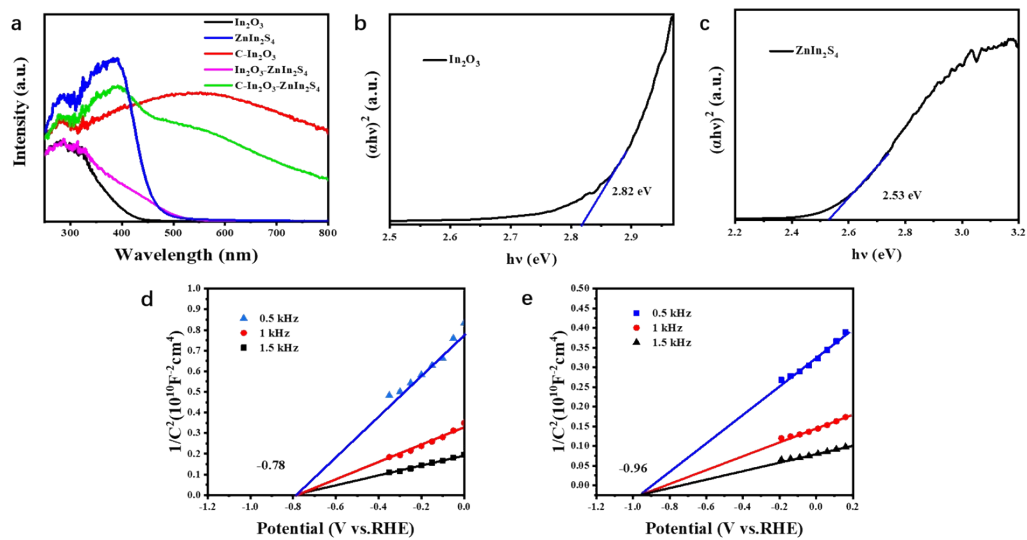

**Figure S18.** (a) UV-vis diffuse reflectance spectra of various photocatalysts; (b, c) Tauc plots of individual  $\text{In}_2\text{O}_3$  and ZIS, and the bandgap energies are calculated 2.82 and 2.53 eV, respectively. (d, e) Mott-Schottky plots of individual  $\text{In}_2\text{O}_3$  and ZIS.

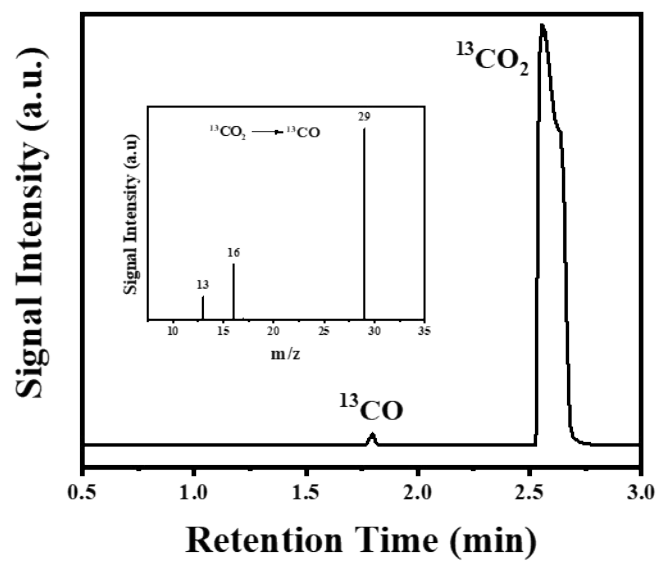

**Figure S19.** Gas chromatogram and mass spectra of  $^{13}\text{CO}$  (inset) produced over PCMT@ $\text{In}_2\text{O}_3$ /ZIS. Carbon dioxide  $^{13}\text{CO}_2$  was used.

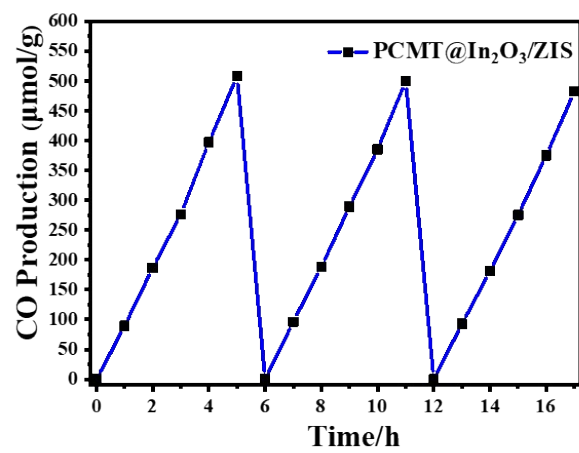

**Figure S20.** The cycle experiment test of PCMT@In<sub>2</sub>O<sub>3</sub>/ZIS.

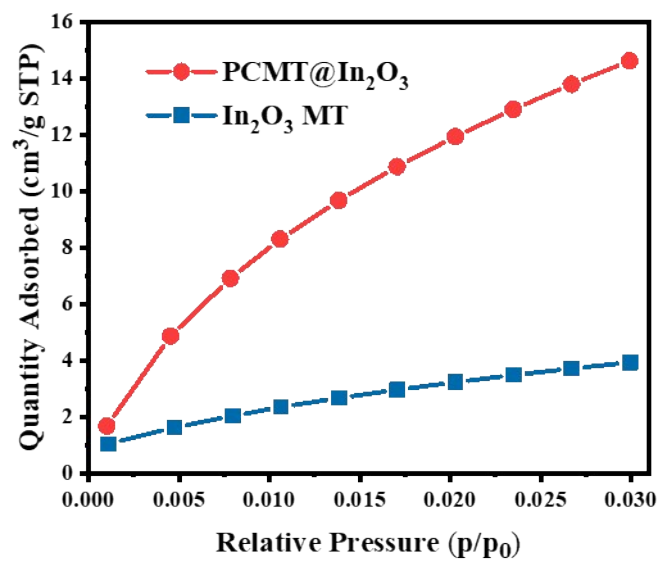

**Figure S21.** Typical CO<sub>2</sub> gas adsorption isotherm of In<sub>2</sub>O<sub>3</sub> MT and PCMT@In<sub>2</sub>O<sub>3</sub>.

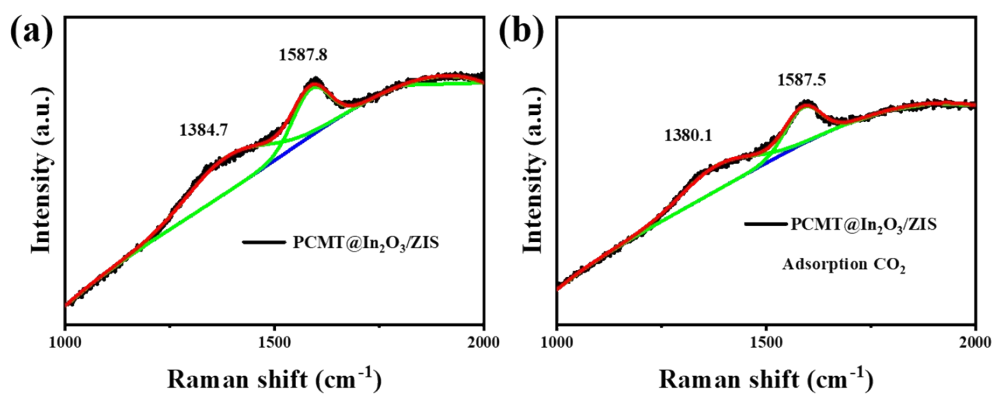

**Figure S22.** Raman spectroscopy of the PCMT@In<sub>2</sub>O<sub>3</sub>/ZIS (a) before and (b) after adsorption CO<sub>2</sub>.

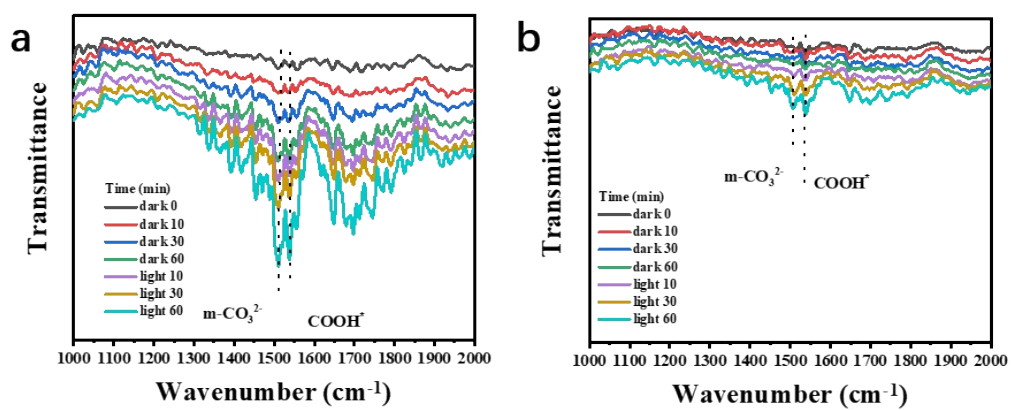

**Figure S23.** *In-situ* Fourier transformation infrared (FTIR) spectra of (a)

PCMT@In<sub>2</sub>O<sub>3</sub> and (b) In<sub>2</sub>O<sub>3</sub> MT.



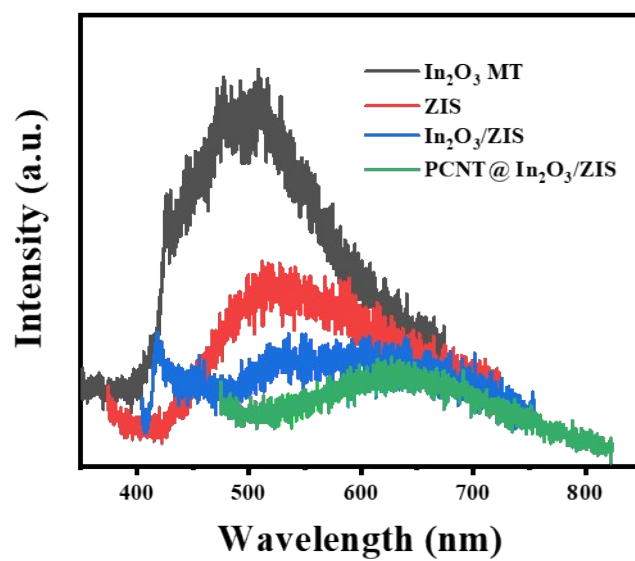

**Figure S24.** PL spectra of various materials.

**Table S1.** The photocatalytic CO<sub>2</sub> reduction performance of PCMT@In<sub>2</sub>O<sub>3</sub>/ZIS compared with other similar systems.

| Catalyst                                                         | Light source                                                                   | Cocatalyst                         | Sacrificial agent | Major product evolution rate ( $\mu\text{mol h}^{-1} \text{g}^{-1}$ ) | Ref.      |
|------------------------------------------------------------------|--------------------------------------------------------------------------------|------------------------------------|-------------------|-----------------------------------------------------------------------|-----------|
| PCMT@In <sub>2</sub> O <sub>3</sub> /IS                          | 300W Xenon lamp, 100mWcm <sup>-2</sup> , AM1.5G                                |                                    |                   | 101.62                                                                | This work |
| 3D-ZIS                                                           | 300W Xenon lamp, 100mWcm <sup>-2</sup> , AM1.5G                                |                                    | TEOA              | CO: 276.6                                                             | [1]       |
| ZnIn <sub>2</sub> S <sub>4</sub> -In <sub>2</sub> O <sub>3</sub> | 300W Xe lamp with a 400 nm longpass cutoff filter                              | Co(bpy) <sub>3</sub> <sup>2+</sup> | TEOA              | CO: 3075                                                              | [2]       |
| C-In <sub>2</sub> O <sub>3</sub>                                 | Xe-lamp (300 W)                                                                | Pt                                 |                   | CO: 633                                                               | [3]       |
| BCN                                                              | 300 W xenon lamp with 420 nm cutoff filter                                     | Co(bpy) <sub>3</sub> <sup>2+</sup> | TEOA              | CO: 94                                                                | [4]       |
| One-Unit-Cell ZnIn <sub>2</sub> S <sub>4</sub>                   | 300W Xenon lamp, 100mWcm <sup>-2</sup> , AM1.5G                                |                                    |                   | CO: 33.2                                                              | [5]       |
| TiO <sub>2</sub> nanotubes                                       | 300W Xenon lamp, 100 mWcm <sup>-2</sup> , AM1.5G                               |                                    |                   | CO: 25 ppm                                                            | [6]       |
| HR-CN                                                            | 300 W Xe-lamp ( $\lambda > 420 \text{ nm}$ )                                   | Co(bpy) <sub>3</sub> <sup>2+</sup> | TEOA              | CO: 297                                                               | [7]       |
| In <sub>2</sub> S <sub>3</sub> -CdIn <sub>2</sub> S <sub>4</sub> | 300 W Xe-lamp $\lambda \geq 400 \text{ nm}$                                    | Co(bpy) <sub>3</sub> <sup>2+</sup> | TEOA              | CO: 825                                                               | [8]       |
| Ag-Cu <sub>2</sub> O/ZnO NRs                                     | 300 W Xe lamp, $\lambda = 320\text{-}780 \text{ nm}$ , 820 mW cm <sup>-2</sup> |                                    |                   | CO: 13.45                                                             | [9]       |
| ZnS-DETA/CdS                                                     | 300 W xenon lamp with 420 nm cutoff filter                                     | Co(bpy) <sub>3</sub> <sup>2+</sup> | TEOA              | CO: 33.3                                                              | [10]      |

## References

- 1 Y. He, H. Rao, K. Song, J. Li, Y. Yu, Y. Lou, C. Li, Y. Han, Z. Shi and S. Feng, *Adv. Funct. Mater.*, 2019, **29**, 1–10.
- 2 S. Wang, B. Y. Guan and X. W. D. Lou, *J. Am. Chem. Soc.*, 2018, **140**, 5037–5040.
- 3 Y. X. Pan, Y. You, S. Xin, Y. Li, G. Fu, Z. Cui, Y. L. Men, F. F. Cao, S. H. Yu and J. B. Goodenough, *J. Am. Chem. Soc.*, 2017, **139**, 4123–4129.
- 4 C. Huang, C. Chen, M. Zhang, L. Lin, X. Ye, S. Lin, M. Antonietti and X. Wang, *Nat. Commun.*, DOI:10.1038/ncomms8698.
- 5 X. Jiao, Z. Chen, X. Li, Y. Sun, S. Gao, W. Yan, C. Wang, Q. Zhang, Y. Lin, Y. Luo and Y. Xie, *J. Am. Chem. Soc.*, 2017, **139**, 7586–7594.
- 6 X. Feng, J. D. Sloppy, T. J. Latempa, M. Paulose, S. Komarneni, N. Bao and C. A. Grimes, *J. Mater. Chem.*, 2011, **21**, 13429–13433.
- 7 Y. Zheng, L. Lin, X. Ye, F. Guo and X. Wang, *Angew. Chemie - Int. Ed.*, 2014, **53**, 11926–11930.
- 8 S. Wang, B. Y. Guan, Y. Lu and X. W. Lou, *J. Am. Chem. Soc.*, 2017, **139**, 17305–17308.
- 9 F. Zhang, Y. H. Li, M. Y. Qi, Z. R. Tang and Y. J. Xu, *Appl. Catal. B Environ.*, 2020, **268**, 118380.
- 10 B. Su, L. Huang, Z. Xiong, Y. Yang, Y. Hou, Z. Ding and S. Wang, *J. Mater. Chem. A*, 2019, **7**, 26877–26883.
